# Supplementary material for: Three-dimensional quick response code based on inkjet printing of upconversion fluorescent nanoparticles for drug anti-counterfeiting
Source: Royal Society of Chemistry journal article supplement (doi:10.1039/c6nr01353h), 2016-01-01
Supplement: c6nr01353h2.pdf [file c6nr01353h2.pdf]

## Three-Dimensional Quick Response Code based on Inkjet Printing of Upconversion Fluorescence Nanoparticles for Drug Anti-Counterfeiting

Minli You <sup>a,b</sup>, Min Lin <sup>a,b#</sup>, Shurui Wang <sup>a,b</sup>, Xuemin Wang <sup>a,b</sup>, Ge Zhang <sup>b</sup>, Yuan Hong <sup>b</sup>, Yuqing Dong <sup>a,b</sup>, Guorui Jin <sup>a,b</sup>, Feng Xu <sup>a,b#</sup>

<sup>a</sup> *The Key Laboratory of Biomedical Information Engineering of Ministry of Education, School of Life Science and Technology, Xi'an Jiaotong University, Xi'an 710049, P.R. China*

<sup>b</sup> *Bioinspired Engineering and Biomechanics Center (BEBC), Xi'an Jiaotong University, Xi'an 710049, P.R. China*

Corresponding authors: [minlin@mail.xjtu.edu.cn](mailto:minlin@mail.xjtu.edu.cn); [fengxu@mail.xjtu.edu.cn](mailto:fengxu@mail.xjtu.edu.cn)

### Counting details of UCNPs content in one 3D QR code

$$n_{drop} = \frac{Area_{3D\ code}}{Area_{drop}},$$

$n_{drop}$  is the number of ink droplets costed in printing one 3D QR code.  $Area_{3D\ code}$  is area of one 3D QR code.  $Area_{drop}$  is area of one ink droplet printed on the substrate. Here the printing resolution we used was 600 dpi (dots per inch), which decided the  $Area_{drop}$  is  $1406.8\ \mu\text{m}^2$  at most. Area of each 3D QR code ( $Area_{3D\ code}$ ) is  $10^8\ \mu\text{m}^2$ .

Therefore,  $n_{drop}$  is about  $7.1 \times 10^4$ .

$$m_{UCNPs} = C_{UCNPs} \times v_{drop} \times n_{drop},$$

$m_{UCNPs}$  is UCNPs mass contained in one 3D QR code.  $C_{UCNPs}$  is the concentration of UCNPs in upconversion ink.  $v_{drop}$  is the volume of one ink droplet. Here,  $v_{drop}$  is  $\sim 1$  pL and  $C_{UCNPs}$  is  $\sim 5$  mg/mL. In consequence, one 3D QR code contains approximately 355 ng UCNPs.

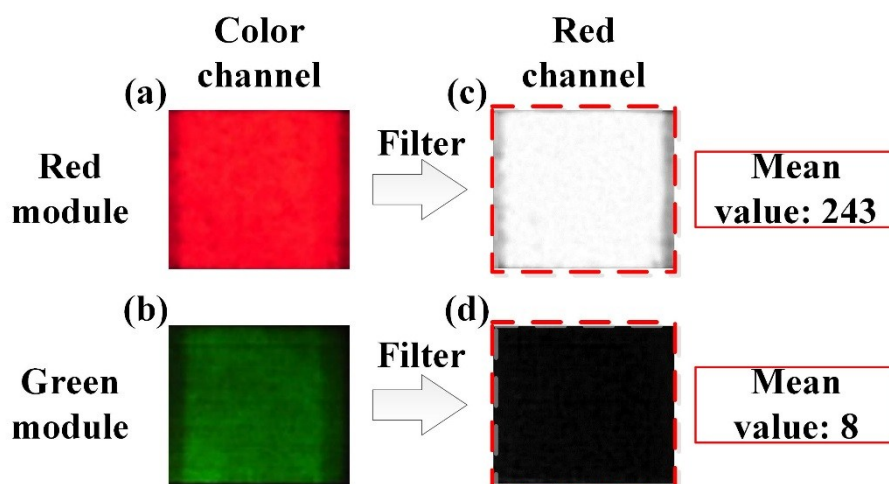

Figure. S1 Images of (a) red module and (b) green module printed by red and green luminescence inks in color channel and (b, d) their grayscale image in red channel.

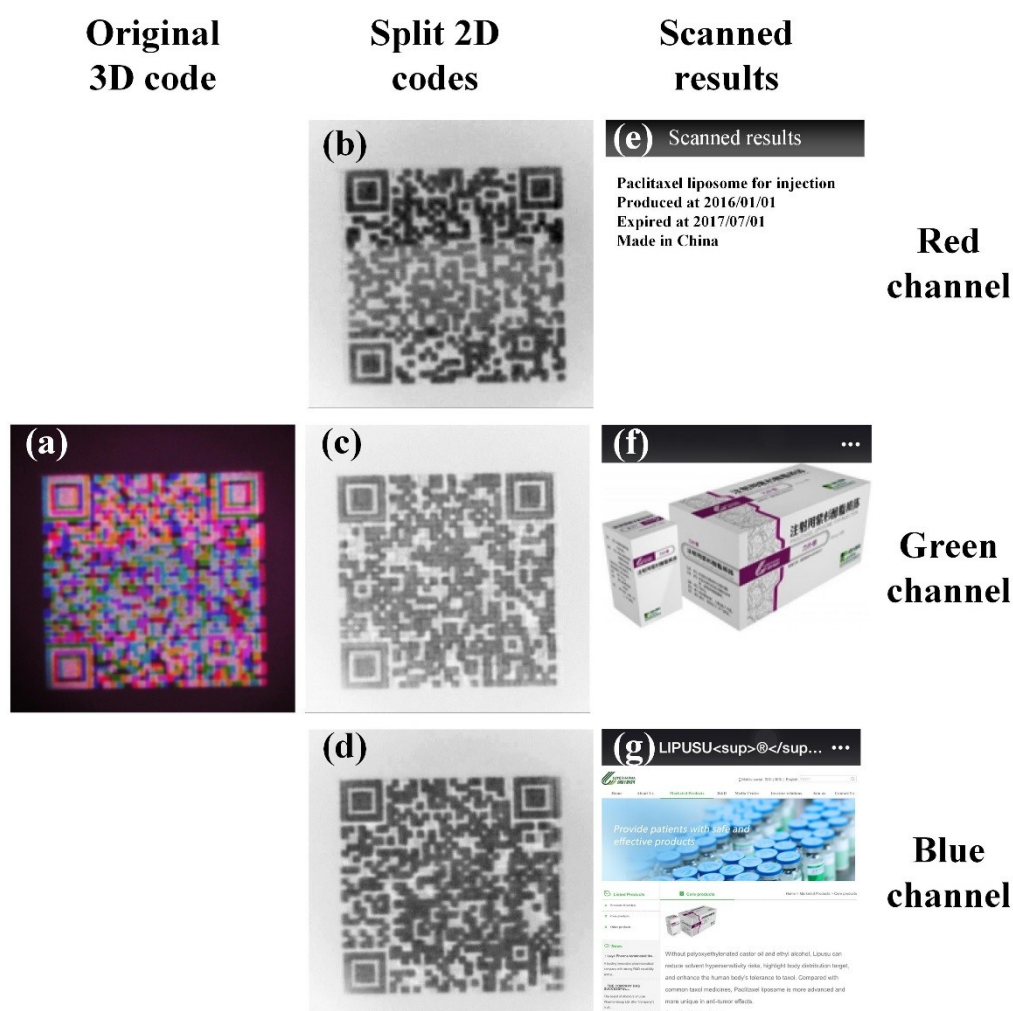

Figure. S2 (a) 3D QR code and three 2D QR codes split from it through (b) blue channel, (c) green channel and (d) red channel. (e-g) Decoding results of corresponding split 2D QR codes.
